# Supplementary material for: IDO-orchestrated crosstalk between pDCs and Tregs inhibits autoimmunity
Source: PubMed Central journal article supplement — J Autoimmun. 2016 Dec;75:39–49. doi: 10.1016/j.jaut.2016.07.004 (PMC5127883; doi:10.1016/j.jaut.2016.07.004), 2016-12
Supplement: mmc1.pdf [file mmc1.pdf]

## **Supplementary Informations**

# **IDO-orchestrated crosstalk between pDCs and Tregs inhibits Autoimmunity**

**Carla Lippens<sup>1</sup>, Fernanda V. Duraes<sup>1,2</sup>, Juan Dubrot<sup>1</sup>, Dale Brighthouse<sup>1</sup>, Mathilde Lacroix, Magali Irla<sup>1,3</sup>, Jean-Pierre Aubry-Lachainaye<sup>4</sup>, Walter Reith<sup>1</sup>, Judith N. Mandl<sup>5,6</sup> and Stéphanie Hugues<sup>1</sup>**

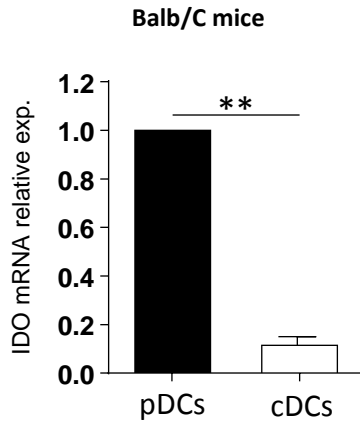

**Supplementary Figure 1. IDO expression by pDCs sorted from LNs of Balb/c mice.** (A) pDCs and cDCs were selectively sorted from total skin LNs of Balb/C mice by flow cytometry and mRNA extraction was performed. IDO mRNA expression in pDCs and cDCs was determined by qPCR. Error bars depict mean  $\pm$  SEM. Two-tailed Mann-Whitney test was used. \*\*  $P < 0.01$ .

## *Ciita* gene

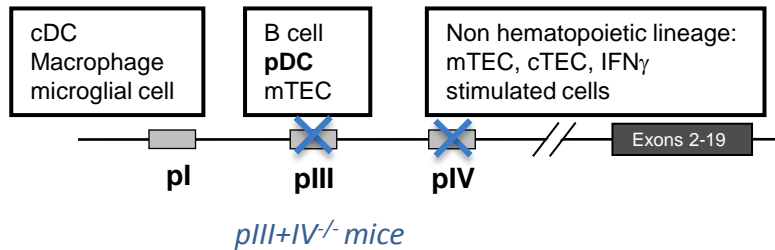

**Supplementary Figure 2. Mice selectively lacking MHCII expression on pDCs.** In mice, *CIITA* gene expression is driven by three different cell specific promoters pI, pIII and pIV. *pIII+IV<sup>-/-</sup>* mice carry the deletion of promoters pIII and pIV. mTECs: medullary thymic epithelial cell, cTECs: cortical TEC. (B-E) WT $\rightarrow$ WT and *pIII+IV<sup>-/-</sup>* $\rightarrow$ WT chimeric mice were generated by transfer of either WT or *pIII+IV<sup>-/-</sup>* bone marrow precursor cells in lethally irradiated WT recipient mice.

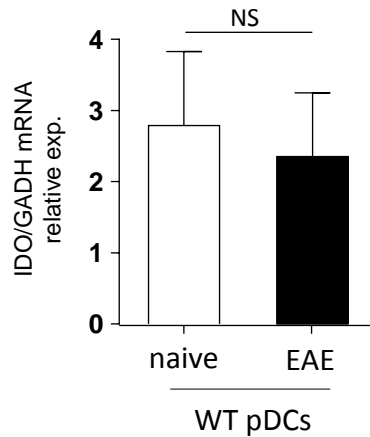

**Supplementary Figure 3. IDO expression by pDCs sorted from LN of naïve and EAE mice.** pDCs were selectively sorted by flow cytometry from total skin LNs of naïve C57Bl/6 WT mice or from draining LNs of EAE C57Bl/6 WT mice at day 10 after immunization. IDO mRNA expression in pDCs was determined by qPCR and expressed relatively compare to GAPDH expression in the same cells. Error bars depict mean  $\pm$  SEM. Two-tailed Mann-Whitney test was used. NS = Non significant.

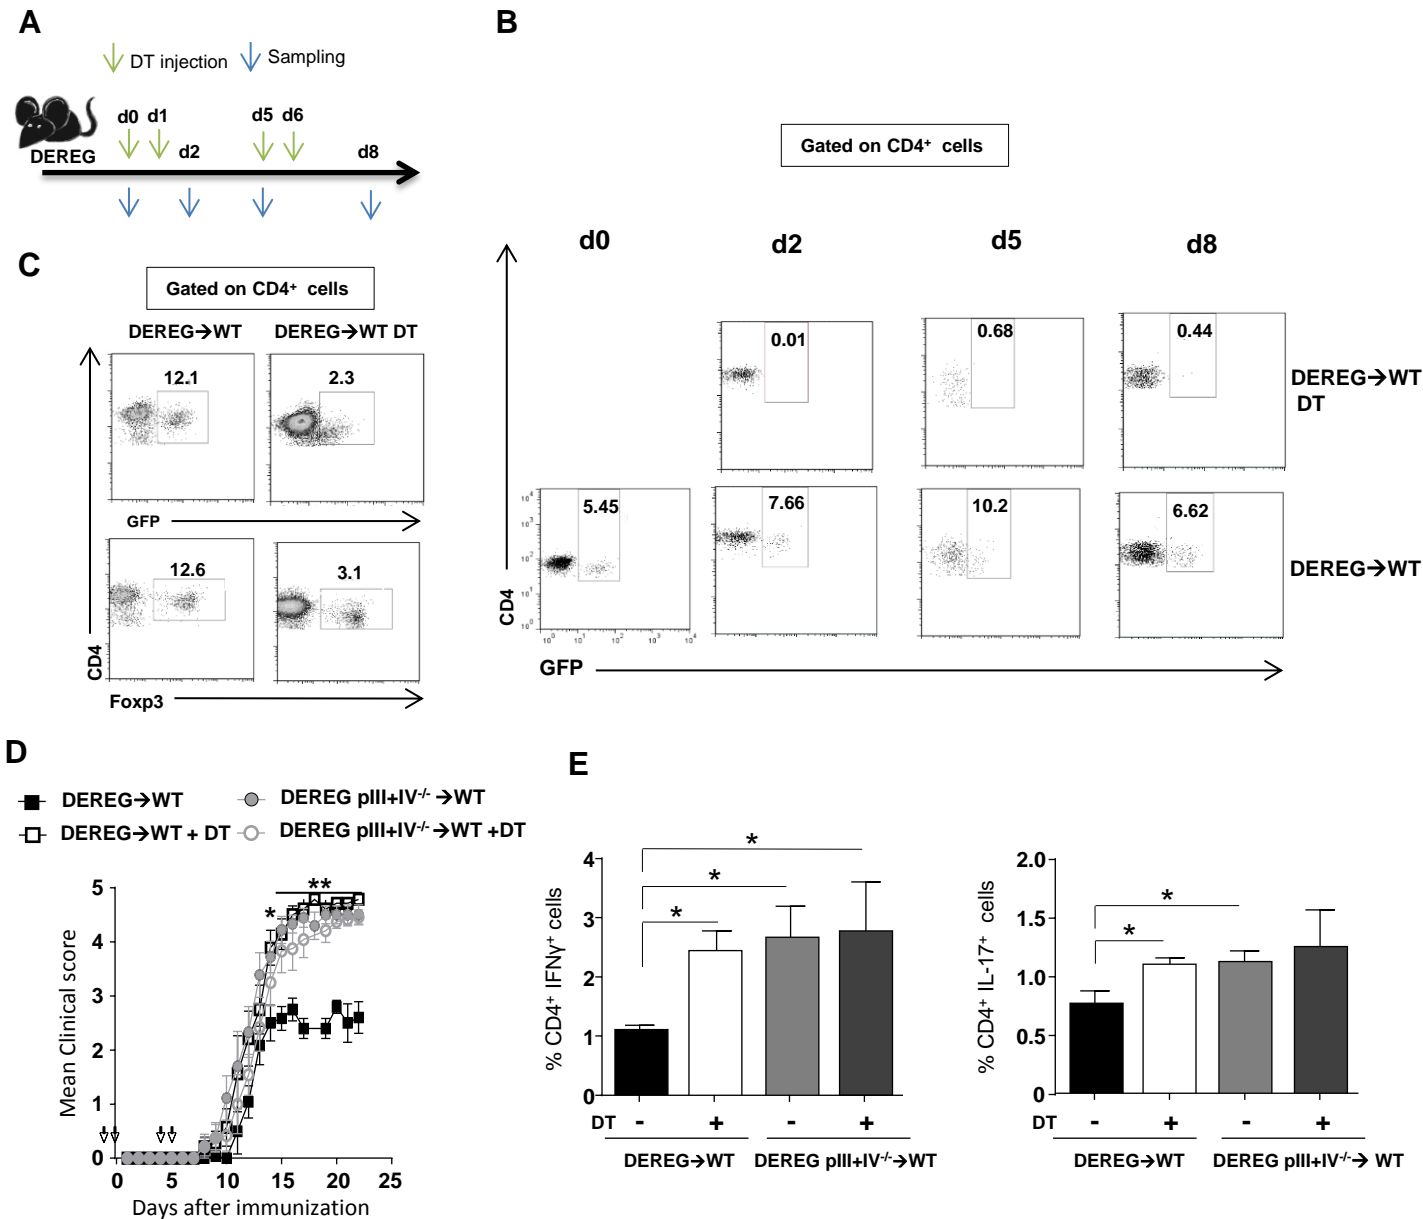

**Supplementary Figure 4. pDC-induced Tregs suppress encephalitogenic T cell priming in lymph nodes.**

DT was injected or not in DEREg→WT BM chimeric mice at d0, d1, d5 and d6. (A) Experimental design is shown. Treg depletion was assessed (B) in dLN at d8 based on CD4<sup>+</sup> Fxp3<sup>+</sup> staining and (C) in blood at d0, d2, d5 and d8 by following CD4<sup>+</sup> GFP<sup>+</sup> cells. Flow cytometry data are shown. (D and E) EAE was induced in DEREg→WT chimeric mice treated (□) or not (■) with DT (arrows) and DEREg x pIII+IV<sup>-/-</sup>→WT chimeric mice treated (○) or not (●) with DT as before (D) Clinical scores were followed daily (two-way ANOVA with Bonferroni post Hoc test). (E) Frequency of IFNγ<sup>+</sup> and IL-17<sup>+</sup> CD4<sup>+</sup> T cells in dLN at d9 (one-way ANOVA with Bonferroni post Hoc test). (A-E) Data are representative of at least 2 independent experiments with 6-8 mice per group. Error bars depict mean ± SEM. \* *P* < 0.05, \*\* *P* < 0.01, \*\*\* *P* < 0.001.

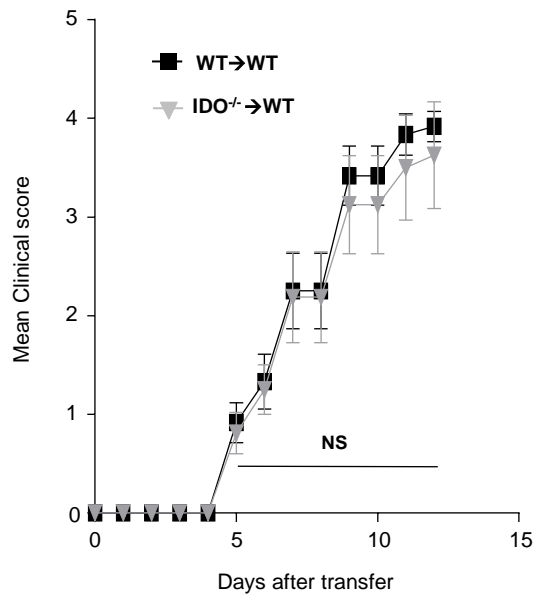

**Supplementary Figure 5. IDO deficiency does not affect EAE effector phase.** Passive EAE was induced by transferring MOG<sub>35-55</sub> primed 2D2 effector T cells in WT→WT (■) and IDO<sup>-/-</sup>→WT (▼) BM chimeras. Clinical scores were followed daily. Error bars represent mean ± SEM (2-way ANOVA with Bonferroni's post-Hoc test). NS = Non significant.

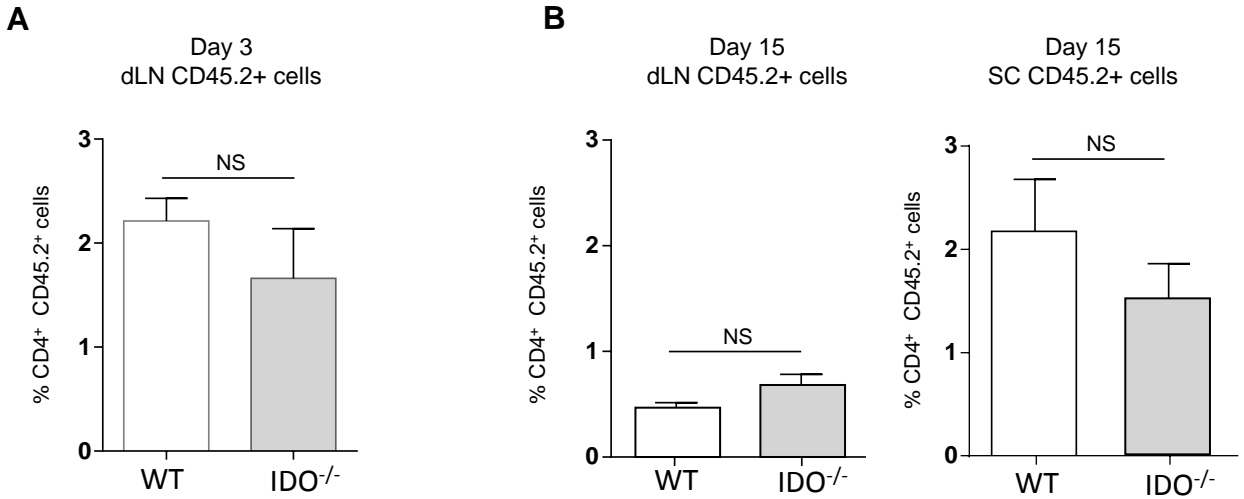

**Supplementary Figure 6. Tregs primed in WT and IDO deficient mice migrate in LNs and SC with similar efficiency upon adoptive transfer in EAE mice.** CD4<sup>+</sup>CD25<sup>hi</sup> (CD45.2<sup>+</sup>) cells were purified from dLNs of WT:WT and IDO<sup>-/-</sup>:WT BM chimeras 10 days after EAE induction and transferred into WT CD45.1<sup>+</sup> recipients immunized for EAE the day after. Donor T cell frequencies among CD4<sup>+</sup> T cells were analysed after gating on CD45.2<sup>+</sup> cells in **(A)** dLNs (day 3) and **(B)** in dLNs and SC (day 15) of recipient mice. Results are representative of 2 independent experiments with 3 mice per group. Error bars depict mean ± SEM. Two-tailed Mann-Whitney test was used. NS = Non significant.
